# Supplementary material
Source: Elsevier journal article supplement (https://www.sciencedirect.com/science/article/pii/S0014256521000114)
Supplement: mmc1 [file S0014256521000114:mmc1.doc]

2. material y métodos

**2.1. Diseño del estudio**

Ha liderado el proyecto un comité científico multidisciplinar integrado por 8 representantes de las sociedades científicas que avalan el proyecto: Sociedad Española de Arteriosclerosis (SEA), Sociedad Española de Cardiología (SEC), Sociedad Española de Diabetes (SED), Sociedad Española de Endocrinología y Nutrición (SEEN), Sociedad Española de Médicos de Atención Primaria (SEMERGEN), Sociedad Española de Medicina de Familia y Comunitaria (semFYC) y Sociedad Española de Medicina Interna (SEMI)],.

Para alcanzar el consenso entre los expertos participantes se llevaron a cabo dos rondas de consulta Delphi, método formal y sistemático para la obtención de consenso entre expertos sobre un área concreta del conocimiento o la práctica habitual. Se caracteriza por ser un proceso iterativo, anónimo, y con realimentación controlada que proporciona una respuesta estadística del grupo13.

El cuestionario de la primera ronda se elaboró basándose en una revisión de la literatura (MedLine/PubMed y literatura gris) y posterior grupo de discusión con el Comité Científico. Estuvo compuesto por 2 secciones: 1) Contexto: cuestiones abiertas y cerradas (multirrespuesta o respuesta dicotómica) sobre las características sociodemográficas y del centro de trabajo del participante**,** y cuestiones relacionadas con la percepción general sobre el objetivo terapéutico de colesterol unido a lipoproteínas de baja densidad(cLDL)14; y 2) Consenso: descripción de la práctica clínica habitual y definición de las estrategias recomendables para la identificación y el cribado del paciente con EAP, el control de factores de riesgo (tabaquismo, DM, cLDL, estilo de vida, hipertensión) y el tratamiento y seguimiento del paciente con EAP.

En la segunda ronda únicamente se incluyeron aquellas afirmaciones que no alcanzaron consenso en la primera ronda. A cada panelista se le mostró su puntuación y la de la mayoría de los panelistas obtenida en la primera ronda.

El grado de acuerdo con las afirmaciones presentadas se evaluó mediante escalas Likert de 7 puntos (de «1=completamente en desacuerdo» a «7=completamente de acuerdo») y desde tres perspectivas: práctica clínica habitual, necesidad y factibilidad de ser implementada a corto-medio plazo (≤ 5 años). Se definió consenso cuando al menos el 75% de los panelistas coincidió en el acuerdo (5-7) o en el desacuerdo (1-3).

**2.2. Panel de expertos**

Cada sociedad científica seleccionó e invitó a los panelistas según su experiencia profesional en el manejo de la EAP. El enlace al cuestionario electrónico se envió por correo electrónico a un total de 250 expertos. La consulta, no remunerada, fue realizada entre mayo y junio de 2019.

**2.3. Análisis de los datos**

Se calcularon los porcentajes obtenidos en cada respuesta, así como las medias y desviaciones estándar (DE) de los valores (STATA, versión 14). Adicionalmente, en algunas cuestiones se realizó un subanálisis por especialidades.
